# Supplementary material for: Diabetes risk and amino acid profiles: cross-sectional and prospective analyses of ethnicity, amino acids and diabetes in a South Asian and European cohort from the SABRE (Southall And Brent REvisited) Study
Source: PubMed Central journal article supplement (PMC4392114; doi:10.1007/s00125-015-3517-8), 2015-02-19
Supplement: 125_2015_3517_MOESM3_ESM.pdf [file 125_2015_3517_MOESM3_ESM.pdf]

ESM Table 2

Harrell's C statistic, Net Reclassification Index (NRI) and Integrated Improvement Index (IDI) for amino acid combinations and conventional risk factors in the prediction of incident diabetes

|                                                                                                                      | European men               | South Asian men              |
|----------------------------------------------------------------------------------------------------------------------|----------------------------|------------------------------|
| Model 1: adjusted for age, waist:hip ratio, truncal skinfold thickness, Matsuda IR, HDL cholesterol, current smoking |                            |                              |
| C statistic                                                                                                          | 0.732                      | 0.738                        |
| Model 1 plus tyrosine                                                                                                |                            |                              |
| C statistic                                                                                                          | 0.731, p=0.7 <sup>b</sup>  | 0.752, p=0.092 <sup>b</sup>  |
| IDI                                                                                                                  | 0.0008, p=0.4 <sup>b</sup> | 0.023, p<0.0001 <sup>b</sup> |
| NRI <sup>a</sup>                                                                                                     | 0.028, p=0.2 <sup>b</sup>  | 0.098, p=0.0014 <sup>b</sup> |
| Model 1 plus isoleucine, phenylalanine, tyrosine                                                                     |                            |                              |
| C statistic                                                                                                          | 0.732, p=1.0 <sup>b</sup>  | 0.745, p=0.5 <sup>b</sup>    |
| IDI                                                                                                                  | 0.0001, p=0.6 <sup>b</sup> | 0.019, p=0.0007 <sup>b</sup> |
| NRI <sup>a</sup>                                                                                                     | 0.011, p=0.7 <sup>b</sup>  | -0.005, p=0.9 <sup>b</sup>   |
| Model 1 plus isoleucine, leucine, valine, phenylalanine, tyrosine                                                    |                            |                              |
| C statistic                                                                                                          | 0.731, p=0.8 <sup>b</sup>  | 0.743, p=0.4 <sup>b</sup>    |
| IDI                                                                                                                  | 0.0004, p=0.5 <sup>b</sup> | 0.023, p=0.0002 <sup>b</sup> |
| NRI <sup>a</sup>                                                                                                     | 0.008, p=0.8 <sup>b</sup>  | -0.022, p=0.5 <sup>b</sup>   |

<sup>a</sup>NRI: Cutpoints for diabetes risk:15%/30%

<sup>b</sup>p value for comparison with model 1
