# Supplementary material for: Diabetes risk and amino acid profiles: cross-sectional and prospective analyses of ethnicity, amino acids and diabetes in a South Asian and European cohort from the SABRE (Southall And Brent REvisited) Study
Source: Springer Nature journal article supplement (doi:10.1007/s00125-015-3517-8), 2015-02-18
Supplement: MOESM2 [file 8092836]

ESM Table 1. Associations between incident diabetes and amino acids (by quartiles). Logistic regression

| Odd ratios  | Quartile                    | Isoleucine        | Leucine          | Valine           | Phenylalanine    | Tyrosine         | Isoleucine, phenylalanine and tyrosine | 5 amino acids(isoleucine, leucine, valine, tyrosine, phenylalanine) |
|-------------|-----------------------------|-------------------|------------------|------------------|------------------|------------------|----------------------------------------|---------------------------------------------------------------------|
|             | Lowest quartile (reference) | 1.00              | 1.00             | 1.00             | 1.00             | 1.00             | 1.00                                   | 1.00                                                                |
| Model 1     | 2 <sup>nd</sup> quartile    | 1.65(0.86, 3.17)  | 1.64(0.83, 3.23) | 1.26(0.65, 2.46) | 0.63(0.34, 1.19) | 1.50(0.82, 2.73) | 1.64(0.88, 3.06)                       | 1.95(1.03, 3.68)                                                    |
| European    | 3 <sup>rd</sup> quartile    | 2.19(1.16, 4.14)  | 2.37(1.24, 4.53) | 1.66(0.88, 3.12) | 1.53(0.88, 2.66) | 2.39(1.34, 4.28) | 2.04(1.10, 3.79)                       | 1.81(0.94, 3.48)                                                    |
|             | 4 <sup>th</sup> quartile    | 3.48(1.90, 6.36)  | 3.34(1.82, 6.13) | 2.46(1.35, 4.49) | 1.43(0.83, 2.45) | 3.07(1.71, 5.50) | 3.56(2.00, 6.33)                       | 3.64(2.00, 6.63)                                                    |
| Model 1     | 2 <sup>nd</sup> quartile    | 1.20(0.71, 2.05)  | 1.25(0.75, 2.08) | 1.18(0.73, 1.91) | 2.52(1.53, 4.14) | 1.33(0.70, 2.52) | 1.50(0.82, 2.76)                       | 1.49(0.85, 2.60)                                                    |
| South Asian | 3 <sup>rd</sup> quartile    | 2.22(1.35, 3.64)  | 2.47(1.51, 4.03) | 1.89(1.19, 3.01) | 1.48(0.90, 2.43) | 3.03(1.68, 5.48) | 3.57(2.03, 6.27)                       | 3.66(2.18, 6.17)                                                    |
|             | 4 <sup>th</sup> quartile    | 2.74(1.67, 4.48)  | 2.41(1.46, 3.99) | 2.55(1.59, 4.07) | 2.53(1.55, 4.15) | 4.67(2.62, 8.28) | 4.44(2.53, 7.81)                       | 3.57(2.12, 6.02)                                                    |
| Model 2     | 2 <sup>nd</sup> quartile    | 1.39(0.71, 2.69)  | 1.36(0.68, 2.70) | 0.99(0.50, 1.98) | 0.53(0.28, 1.02) | 1.25(0.68, 2.30) | 1.31(0.69, 2.48)                       | 1.52(0.79, 2.91)                                                    |
| European    | 3 <sup>rd</sup> quartile    | 1.70(0.89, 3.27)  | 1.78(0.92, 3.46) | 1.11(0.57, 2.15) | 1.15(0.65, 2.04) | 1.67(0.91, 3.07) | 1.39(0.73, 2.66)                       | 1.26(0.64, 2.49)                                                    |
|             | 4 <sup>th</sup> quartile    | 2.30(1.23, 4.33)  | 2.42(1.30, 4.52) | 1.63(0.87, 3.06) | 1.02(0.58, 1.80) | 2.00(1.08, 3.69) | 2.26(1.22, 4.17)                       | 2.36(1.26, 4.42)                                                    |
| Model 2     | 2 <sup>nd</sup> quartile    | 0.99(0.57, 1.71)  | 1.24(0.73, 2.09) | 1.10(0.67, 1.80) | 2.30(1.37, 3.86) | 1.24(0.65, 2.39) | 1.18(0.64, 2.21)                       | 1.23(0.69, 2.17)                                                    |
| South Asian | 3 <sup>rd</sup> quartile    | 1.65(0.99, 2.76)  | 2.09(1.26, 3.48) | 1.52(0.94, 2.47) | 1.17(0.70, 1.96) | 2.49(1.36, 4.57) | 2.47(1.37, 4.44)                       | 2.57(1.49, 4.42)                                                    |
|             | 4 <sup>th</sup> quartile    | 1.78(1.06, 3.00)  | 1.82(1.07, 3.09) | 1.94(1.18, 3.18) | 1.79(1.06, 3.01) | 3.25(1.78, 5.94) | 2.79(1.54, 5.07)                       | 2.39(1.38, 4.16)                                                    |
| Model 3     | 2 <sup>nd</sup> quartile    | 1.10(0.55, 2.20)  | 1.24(0.61, 2.52) | 1.03(0.51, 2.10) | 0.48(0.25, 0.95) | 1.09(0.58, 2.06) | 1.01(0.52, 1.97)                       | 1.20(0.61, 2.36)                                                    |
| European    | 3 <sup>rd</sup> quartile    | 1.31(0.66, 2.58)  | 1.40(0.71, 2.78) | 0.84(0.42, 1.71) | 0.96(0.53, 1.76) | 1.46(0.78, 2.73) | 1.21(0.62, 2.35)                       | 1.06(0.53, 2.12)                                                    |
|             | 4 <sup>th</sup> quartile    | 1.65(0.85, 3.21)  | 1.90(0.99, 3.63) | 1.34(0.69, 2.61) | 0.78(0.43, 1.43) | 1.43(0.74, 2.77) | 1.50(0.78, 2.88)                       | 1.62(0.83, 3.14)                                                    |
| Model 3     | 2 <sup>nd</sup> quartile    | 0.88(0.50, 1.560) | 1.16(0.67, 2.01) | 1.01(0.61, 1.69) | 2.24(1.30, 3.86) | 1.12(0.57, 2.21) | 1.11(0.58, 2.10)                       | 1.19(0.66, 2.16)                                                    |
| South Asian | 3 <sup>rd</sup> quartile    | 1.21(0.70, 2.10)  | 1.74(1.01, 2.97) | 1.17(0.69, 1.96) | 1.10(0.93, 0.99) | 2.29(1.21, 4.31) | 2.14(1.15, 3.96)                       | 2.08(1.17, 3.70)                                                    |
|             | 4 <sup>th</sup> quartile    | 1.34(0.77, 2.33)  | 1.73(0.99, 3.02) | 1.64(0.97, 2.77) | 1.60(0.92, 2.76) | 2.79(1.49, 5.23) | 2.15(1.14, 4.03)                       | 1.96(1.09, 3.52)                                                    |
| Model 4     | 2 <sup>nd</sup> quartile    | 0.87(0.49, 1.56)  | 1.34(0.65, 2.73) | 1.11(0.54, 2.30) | 0.45(0.23, 0.90) | 1.06(0.55, 2.04) | 0.92(0.46, 1.81)                       | 1.21(0.61, 2.39)                                                    |
| European    | 3 <sup>rd</sup> quartile    | 1.28(0.73, 2.24)  | 1.34(0.66, 2.70) | 0.91(0.44, 1.87) | 0.90(0.49, 1.67) | 1.48(0.79, 2.79) | 1.17(0.60, 2.31)                       | 1.01(0.50, 2.06)                                                    |
|             | 4 <sup>th</sup> quartile    | 1.23(0.70, 2.17)  | 2.01(1.04, 3.89) | 1.40(0.71, 2.78) | 0.77(0.42, 1.42) | 1.56(0.80, 3.04) | 1.52(0.79, 2.94)                       | 1.67(0.85, 3.29)                                                    |
| Model 4     | 2 <sup>nd</sup> quartile    | 1.08(0.54, 2.18)  | 1.23(0.70, 2.17) | 0.99(0.59, 1.69) | 1.98(1.13, 3.47) | 1.14(0.56, 2.29) | 1.13(0.58, 2.17)                       | 1.25(0.68, 2.29)                                                    |
| South Asian | 3 <sup>rd</sup> quartile    | 1.28(0.64, 2.56)  | 1.69(0.98, 2.93) | 1.28(0.75, 2.18) | 0.93(0.53, 1.64) | 2.22(1.15, 4.27) | 2.06(1.09, 3.88)                       | 1.97(1.09, 3.55)                                                    |
|             | 4 <sup>th</sup> quartile    | 1.70(0.86, 3.32)  | 2.01(1.04, 3.89) | 1.65(0.97, 2.82) | 1.39(0.79, 2.45) | 2.63(1.37, 5.03) | 1.94(1.01, 3.71)                       | 1.83(1.00, 3.34)                                                    |
| Model 5     | 2 <sup>nd</sup> quartile    | 1.40(0.71, 2.75)  | 1.38(0.69, 2.78) | 0.98(0.49, 1.96) | 0.57(0.29, 1.09) | 1.15(0.61, 2.14) | 1.39(0.73, 2.66)                       | 1.51(0.78, 2.93)                                                    |
| European    | 3 <sup>rd</sup> quartile    | 1.80(0.93, 3.47)  | 1.78(0.91, 3.48) | 1.09(0.56, 2.12) | 1.12(0.62, 2.01) | 1.58(0.86, 2.92) | 1.41(0.74, 2.71)                       | 1.27(0.64, 2.50)                                                    |
|             | 4 <sup>th</sup> quartile    | 2.07(1.09, 3.94)  | 2.12(1.12, 4.01) | 1.43(0.75, 2.70) | 0.96(0.54, 1.71) | 1.50(0.80, 2.83) | 1.99(1.07, 3.67)                       | 1.98(1.05, 3.76)                                                    |
| Model 5     | 2 <sup>nd</sup> quartile    | 1.07(0.61, 1.88)  | 1.28(0.74, 2.19) | 1.24(0.75, 2.06) | 2.52(1.48, 4.29) | 1.27(0.65, 2.47) | 1.48(0.79, 2.79)                       | 1.45(0.81, 2.60)                                                    |
| South Asian | 3 <sup>rd</sup> quartile    | 1.79(1.06, 3.03)  | 2.24(1.32, 3.80) | 1.59(0.97, 2.61) | 1.41(0.83, 2.39) | 2.47(1.33, 4.57) | 2.96(1.62, 5.37)                       | 2.99(1.72, 5.20)                                                    |
|             | 4 <sup>th</sup> quartile    | 2.09(1.23, 3.56)  | 2.06(1.20, 3.54) | 1.98(1.20, 3.29) | 2.19(1.29, 3.72) | 3.08(1.67, 5.66) | 3.11(1.71, 5.67)                       | 2.55(1.46, 4.48)                                                    |

Model 1: adjusted for age, Model 2: adjusted for age, waist:hip ratio, truncal skinfold thickness, Model 3: adjusted for age, waist:hip ratio, truncal skinfold thickness, Matsuda IR, HDL cholesterol, current smoking, Model 4: Model 3 plus alcohol consumption, Model 5: adjusted for age, fasting glucose, BMI (for comparison with the Framingham Offspring Study)

ESM Table 1(continued). Associations between incident diabetes and amino acids (by quartiles)

| Odds ratios | Quartile                 | Alanine          | Glutamine        | Glycine          | Histidine        |
|-------------|--------------------------|------------------|------------------|------------------|------------------|
|             | Lowest quartile (ref)    | 1.00             | 1.00             | 1.00             | 1.00             |
| Model 1     | 2 <sup>nd</sup> quartile | 1.41(0.77, 2.58) | 0.92(0.54, 1.56) | 0.83(0.48, 1.42) | 0.80(0.44, 1.44) |
| European    | 3 <sup>rd</sup> quartile | 1.48(0.82, 2.67) | 0.82(0.48, 1.43) | 0.79(0.46, 1.35) | 1.30(0.76, 2.22) |
|             | 4 <sup>th</sup> quartile | 2.23(1.27, 3.91) | 0.90(0.51, 1.61) | 0.42(0.23, 0.78) | 0.96(0.54, 1.70) |
| Model 1     | 2 <sup>nd</sup> quartile | 1.68(1.00, 2.83) | 0.62(0.38, 1.00) | 0.99(0.63, 1.55) | 0.96(0.59, 1.56) |
| South Asian | 3 <sup>rd</sup> quartile | 1.97(1.16, 3.33) | 0.80(0.50, 1.29) | 0.79(0.49, 1.25) | 1.25(0.78, 2.02) |
|             | 4 <sup>th</sup> quartile | 3.01(1.81, 5.01) | 0.67(0.43, 1.07) | 0.96(0.61, 1.52) | 1.33(0.83, 2.13) |
| Model 2     | 2 <sup>nd</sup> quartile | 1.22(0.66, 2.25) | 0.86(0.50, 1.48) | 0.87(0.50, 1.51) | 0.83(0.45, 1.51) |
| European    | 3 <sup>rd</sup> quartile | 1.25(0.68, 2.28) | 0.85(0.48, 1.48) | 0.82(0.47, 1.42) | 1.30(0.75, 2.25) |
|             | 4 <sup>th</sup> quartile | 1.66(0.93, 2.97) | 1.08(0.60, 1.97) | 0.46(0.25, 0.86) | 0.86(0.94, 1.00) |
| Model 2     | 2 <sup>nd</sup> quartile | 1.49(0.90, 2.56) | 0.59(0.36, 0.99) | 1.07(0.68, 1.71) | 0.91(0.55, 1.51) |
| South Asian | 3 <sup>rd</sup> quartile | 1.60(0.93, 2.76) | 0.86(0.52, 1.41) | 0.81(0.50, 1.32) | 1.17(0.71, 1.92) |
|             | 4 <sup>th</sup> quartile | 2.32(1.37, 3.94) | 0.82(0.51, 1.33) | 1.05(0.65, 1.70) | 1.20(0.73, 1.97) |
| Model 3     | 2 <sup>nd</sup> quartile | 1.15(0.61, 2.19) | 0.95(0.54, 1.69) | 0.78(0.43, 1.40) | 0.84(0.45, 1.57) |
| European    | 3 <sup>rd</sup> quartile | 1.13(0.60, 2.12) | 0.84(0.46, 1.52) | 0.75(0.42, 1.33) | 1.32(0.74, 2.36) |
|             | 4 <sup>th</sup> quartile | 1.39(0.75, 2.59) | 1.11(0.59, 2.09) | 0.44(0.22, 0.84) | 0.84(0.45, 1.57) |
| Model 3     | 2 <sup>nd</sup> quartile | 1.50(0.86, 2.64) | 0.56(0.33, 0.96) | 1.16(0.71, 1.89) | 1.02(0.60, 1.73) |
| South Asian | 3 <sup>rd</sup> quartile | 1.39(0.78, 2.46) | 0.90(0.53, 1.53) | 0.84(0.51, 1.39) | 1.23(0.73, 2.08) |
|             | 4 <sup>th</sup> quartile | 2.06(1.18, 3.59) | 0.78(0.47, 1.31) | 1.12(0.67, 1.86) | 1.34(0.79, 2.25) |
| Model 4     | 2 <sup>nd</sup> quartile | 1.30(0.67, 2.52) | 0.98(0.55, 1.76) | 0.72(0.40, 1.32) | 0.97(0.57, 1.68) |
| European    | 3 <sup>rd</sup> quartile | 1.34(0.69, 2.58) | 0.78(0.42, 1.44) | 0.76(0.42, 1.36) | 1.31(0.77, 2.24) |
|             | 4 <sup>th</sup> quartile | 1.72(0.90, 3.28) | 1.07(0.56, 2.04) | 0.44(0.22, 0.85) | 1.20(0.70, 2.06) |
| Model 4     | 2 <sup>nd</sup> quartile | 1.40(0.79, 2.49) | 0.60(0.34, 1.04) | 1.04(0.62, 1.73) | 0.84(0.45, 1.58) |
| South Asian | 3 <sup>rd</sup> quartile | 1.27(0.71, 2.27) | 1.06(0.61, 1.85) | 0.81(0.48, 1.36) | 1.29(0.71, 2.32) |
|             | 4 <sup>th</sup> quartile | 1.75(0.99, 3.09) | 0.97(0.56, 1.65) | 1.09(0.65, 1.85) | 0.84(0.45, 1.57) |
| Model 5     | 2 <sup>nd</sup> quartile | 1.15(0.62, 2.18) | 0.88(0.50, 1.54) | 0.95(0.53, 1.67) | 0.84(0.45, 1.57) |
| European    | 3 <sup>rd</sup> quartile | 1.00(0.53, 1.87) | 0.87(0.49, 1.55) | 0.87(0.49, 1.54) | 1.38(0.78, 2.43) |
|             | 4 <sup>th</sup> quartile | 1.31(0.72, 2.39) | 1.19(0.65, 2.20) | 0.48(0.25, 0.90) | 0.81(0.45, 1.48) |
| Model 4     | 2 <sup>nd</sup> quartile | 1.31(0.76, 2.29) | 0.65(0.39, 1.10) | 1.08(0.67, 1.76) | 0.91(0.54, 1.54) |
| South Asian | 3 <sup>rd</sup> quartile | 1.44(0.82, 2.51) | 0.89(0.53, 1.49) | 0.79(0.48, 1.30) | 1.20(0.72, 2.00) |
|             | 4 <sup>th</sup> quartile | 1.94(1.13, 3.36) | 0.77(0.47, 1.27) | 1.09(0.67, 1.79) | 1.16(0.95, 1.93) |
